1 **A combined RNA-seq and whole genome**  
2 **sequencing approach for identification of**  
3 **non-coding pathogenic variants in single**  
4 **families.**

5

6 Revital Bronstein,<sup>1</sup> Elizabeth E. Capowski,<sup>2</sup> Sudeep Mehrotra,<sup>1</sup> Alex D. Jansen,<sup>2</sup>  
7 Daniel Navarro-Gomez,<sup>1</sup> Mathew Maher,<sup>1</sup> Emily Place,<sup>1</sup> Riccardo Sangermano,<sup>1</sup>  
8 Kinga M.Bujakowska,<sup>1</sup> David M. Gamm,<sup>3</sup> Eric A. Pierce,<sup>1\*</sup>.

9

10 1. Ocular Genomics Institute, Massachusetts Eye and Ear Infirmary, Harvard  
11 Medical School, Boston, MA, 02114, USA.

12 2. University of Wisconsin-Madison, Waisman Center Stem Cell Research  
13 Program, Madison, WI, 53705, USA.

14 3. Department of Ophthalmology and Visual Sciences, University of Wisconsin-  
15 Madison, McPherson Eye Research Institute, Waisman Center Stem Cell  
16 Research Program, Madison, WI, 53705, USA.

17 \*Correspondence: [eric\\_pierce@meei.harvard.edu](mailto:eric_pierce@meei.harvard.edu)

18

## 19 Abstract

20 Inherited retinal degenerations (IRDs) are at the focus of current genetic  
21 therapeutic advancements. For a genetic treatment such as gene therapy to be  
22 successful an accurate genetic diagnostic is required. Genetic diagnostics relies  
23 on the assessment of the probability that a given DNA variant is pathogenic.  
24 Non-coding variants present a unique challenge for such assessments as  
25 compared to coding variants. For one, non-coding variants are present at much  
26 higher number in the genome than coding variants. In addition, our  
27 understanding of the rules that govern the non-coding regions of the genome is  
28 less complete than our understanding of the coding regions. Methods that allow  
29 for both the identification of candidate non-coding pathogenic variants and their  
30 functional validation may help overcome these caveats allowing for a greater  
31 number of patients to benefit from advancements in genetic therapeutics. We  
32 present here an unbiased approach combining whole genome sequencing  
33 (WGS) with patient induced pluripotent stem cell (iPSC) derived retinal organoids  
34 (ROs) transcriptome analysis. With this approach we identified and functionally  
35 validated a novel pathogenic non-coding variant in a small family with a  
36 previously unresolved genetic diagnosis.

37

## 38 Introduction

39 Inherited retinal degenerations (IRDs) are a leading cause of blindness,  
40 altogether affecting >2million people worldwide. IRDs are characterized by  
41 progressive degeneration of photoreceptor and/or retinal pigment epithelial  
42 (RPE) cells of the retina with variable age of onset and rates of degeneration<sup>1</sup>.  
43 Despite tremendous ongoing efforts and research into various therapeutics,  
44 treatments for IRDs remain limited. Currently there are two regulatory agency-  
45 approved treatment approaches, retinal prosthesis implants and gene  
46 augmentation therapy for IRD caused by mutations in the *RPE65* gene<sup>1-7</sup>. The  
47 eye is a prime candidate for gene therapy approaches due to its relative immune-  
48 privilege, surgical accessibility and ease of non-invasive monitoring. In addition,  
49 IRDs are Mendelian disorders caused by mutations in single genes in the vast  
50 majority of cases. Owing to these favorable circumstances several gene/genetic  
51 therapy clinical trials have been initiated for IRDs, including those caused by  
52 mutations in the *ABCA4*, *CEP290*, *CHM*, *CNGA3*, *CNGB3*, *MYO7A*, *RPGR*,  
53 *RS1*, and *USH2A*<sup>6</sup>.

54 As each genetic therapy targets a specific gene, for a patient to be considered for  
55 treatment they must obtain a reliable genetic diagnosis. Difficulties inherent to  
56 genetic diagnostics are rooted in the fact that every individual carries millions of  
57 DNA variants in their genome<sup>8,9</sup>. The large majority of the DNA variants are  
58 found in non-coding regions of the genome such as intergenic and intronic  
59 regions. Since non-coding sequences can better tolerate sequence variation

60 compared to coding sequences, most of these variants are benign and do not  
61 lead to disease. Still, some non-coding variants are found to be pathogenic by  
62 altering gene expression and/or splicing patterns<sup>10-12</sup>. As a result, non-coding  
63 variants are among the hardest to classify and thus under-diagnosed<sup>13,14</sup>.  
64 Algorithms exist that predict the effect of a non-coding variant on gene  
65 expression or splicing based on analysis of the DNA sequence alone, but their  
66 accuracy for diagnostic purposes remains undetermined<sup>15-18</sup>.

67 In order to functionally test the effects of non-coding variants one needs to  
68 quantify the level of gene expression and analyze the splicing patterns of the  
69 presumably affected genes. When multiple variants in multiple genes need to be  
70 evaluated, advanced methods for whole transcriptome analysis are  
71 advantageous. Indeed, previous studies successfully utilized large RNA-seq  
72 datasets from tissue biopsies to identify novel non-coding pathogenic variants  
73<sup>19,20</sup>. For example, Evrony *et al* narrowed down a linkage analysis in a very large  
74 pedigree to a single non-coding variant using RNA-seq. This non-coding variant  
75 was shown to cause intron retention in the *DONSON* gene and is most likely the  
76 genetic cause of microcephaly-micromelia syndrome (MMS) in this population<sup>19</sup>.  
77 Cummings *et al* used 184 skeletal muscle RNA-seq samples available through  
78 Genotype-Tissue Expression resource (GTEx)<sup>21</sup> as a reference panel for 50  
79 patients with undiagnosed muscle disorders. This comparison led to a genetic  
80 diagnosis for 17 previously unsolved families and identification of several splice  
81 altering variants<sup>20</sup>.

82 Such studies depend on the availability of large, publicly available RNA-seq  
83 datasets and/or on a large cohort of patients. They also require biopsy samples  
84 from a clinically relevant tissue or cell type. Both gene expression and splicing  
85 are tissue-specific<sup>22,23</sup> owing to restricted availability of transcription and splicing  
86 factors with variable usage of regulatory DNA sequences<sup>24-27</sup>. Consequently,  
87 DNA variants in such regulatory sequences can have tissue-specific outcomes  
88 on gene expression and splicing<sup>18,28</sup>. Thus, analyzing RNA from a clinically  
89 relevant tissue or cell type is crucial to obtain a more focused and reliable  
90 diagnostic result. When a clinically relevant tissue is not accessible, *ex vivo*  
91 surrogate models can sometimes suffice. Indeed, a study aimed at discerning the  
92 genetic causality of patients with monogenetic neuromuscular disorders found  
93 that t-myotubes, skeletal myotubes derived by myoD overexpression in  
94 fibroblasts, accurately reflected the muscle transcriptome and faithfully revealed  
95 pathogenic variants<sup>29</sup>.

96 In this study, we aimed to develop a pipeline that would detect putative non-  
97 coding pathogenic mutations in a small family. We present a pilot study  
98 performed in a five member family with two siblings affected by cone dysfunction  
99 syndrome in which we successfully identify and functionally validate a novel deep  
100 intronic variant without the use of large reference datasets. Obtaining a clinically  
101 relevant tissue from IRD patients is not possible as the retina cannot be safely  
102 biopsied. To overcome this limitation, we have made use of patient-derived  
103 induced pluripotent stem cells (iPSCs) that were differentiated *in vitro* to form  
104 retinal organoids (ROs)<sup>30</sup>. ROs have been shown to recapitulate many aspects of

105 human retinal structure and function<sup>30,31,40,32–39</sup>. We show that the RO  
106 transcriptome is much closer to the transcriptome of normal human retina than  
107 other more readily available diagnostic tissues. More importantly, we show for  
108 the first time that analysis of a patient-derived RO transcriptome can successfully  
109 detect pathogenic deep intronic variants that activate cryptic splice sites, leading  
110 to a new genetic diagnosis. Our approach can lead to a larger number of patients  
111 to be eligible for genetic therapies.

## 112 Materials and Methods

### 113 Human Subjects

114 The study was approved by the institutional review board at the Massachusetts  
115 Eye and Ear (Human Studies Committee MEE in USA) and adhered to the  
116 Declaration of Helsinki. Informed consent was obtained from all individuals on  
117 whom genetic testing and further molecular evaluations were performed.

### 118 Pluripotent Stem Cell Induction

119 Tissue samples were obtained with written informed consent in adherence with  
120 the Declaration of Helsinki and with approval from institutional review boards at  
121 the University of Wisconsin-Madison and Massachusetts Eye and Ear Infirmary.  
122 Blood samples from 4 individuals from family OGI-081 (197, 198, 200 and 340)  
123 were collected and reprogrammed by Cellular Dynamics, Inc (now FUJIFILM  
124 Cellular Dynamics, Inc) as custom MyCell products. Three independent clones  
125 from each individual were karyotypically normal, expressed pluripotency markers  
126 and successfully differentiated to retinal organoids (<sup>41</sup>: lines 1579, 1580, 1581

127 and 1582). Stem cells were maintained on Matrigel (ThermoFisher) in either  
128 mTeSR1 (WiCell) or Stemflex (ThermoFisher) and passaged with either Versene  
129 or ReLeSR (STEMCELL Technologies).

### 130 Retinal Organoid (RO) Differentiation

131 Differentiation of iPSCs was performed as previously described<sup>41</sup>. Briefly,  
132 embryoid bodies (EB) were lifted with either 2 mg/ml dispase or ReLeSR and  
133 weaned into Neural Induction Media (NIM: DMEM:F12 1:1, 1% N2 supplement,  
134 1x MEM nonessential amino acids (MEM NEAA), 1x GlutaMAX and 2 mg/ml  
135 heparin (Sigma)) over the course of 4 days. On day 6, 1.5 nM BMP4 (R&D  
136 Systems) was added to fresh NIM and on day 7, EBs were plated on Matrigel at  
137 a density of 200 EBs per well of a 6-well plate. Half the media was replaced with  
138 fresh NIM on days 9, 12 and 15 to gradually dilute the BMP4 and on day16, the  
139 media was changed to Retinal Differentiation Media (RDM: DMEM:F12 3:1, 2%  
140 B27 supplement, MEM NEAA, 1X antibiotic, anti-mycotic and 1x GlutaMAX). On  
141 days 25-30, optic vesicle-like structures were manually dissected and maintained  
142 as free floating organoids in poly HEMA (Sigma)- coated flasks with twice weekly  
143 feeding of 3D-RDM (RDM + 5% FBS (WiCell), 100  $\mu$ M taurine (Sigma) and  
144 1:1000 chemically defined lipid supplement) to which 1  $\mu$ M all-trans retinoic acid  
145 (Sigma) was added until d100. Live cultures were imaged on a Nikon Ts2-FL  
146 equipped with a DS-fi3 camera.

### 147 Immunocytochemistry and Microscopy

148 Organoids were fixed in 4% paraformaldehyde at room temperature for 40 min,  
149 cryopreserved in 15% sucrose followed by equilibration in 30% sucrose, and

150 sectioned on a cryostat. Sections were blocked for 1 hr at room temperature (RT)  
151 in 10% normal donkey serum, 5% BSA, 1% fish gelatin and 0.5% Triton then  
152 incubated overnight at 4°C with primary antibodies diluted in block. Table S1 lists  
153 primary antibodies, dilutions and sources. Slides were incubated with species-  
154 specific fluorophore-conjugated secondary antibodies diluted 1:500 in block, for  
155 30 minutes in the dark at RT (Alexa Fluor 488, AF546 and AF647). Sections  
156 were imaged on a Nikon A1R-HD laser scanning confocal microscope (Nikon  
157 Corporation, Tokyo, Japan).

#### 158 DNA Sequencing

159 DNA was extracted from venous blood using the DNeasy Blood and Tissue Kit  
160 (Qiagen, Hilden, Germany). OGI-081-197 underwent GEDi sequencing as  
161 described previously<sup>42</sup>. All five family members underwent whole exome and  
162 PCR-free whole genome sequencing. Sequencing was done at the Genomics  
163 Core at Massachussets Eye and Ear as described previously<sup>43</sup>.

#### 164 RNA Sequencing

165 For transcriptome analysis, ROs from at least 2 different clones per individual  
166 were harvested at approximately day160 (early stage 3), lysed in 350 µl buffer  
167 RLT+ME from the RNeasy mini kit (Qiagen), snap frozen on dry ice and stored at  
168 -80C. At a later time samples were defrosted on ice and passed through  
169 QIAshredder columns (Qiagen). Subsequently, Total RNA was extracted per the  
170 manufacturer's instructions. RNA quality and quantity was assessed on an  
171 Agilent 2100 Bioanalyzer, RIN number ranged between 9.6-9.9. For each sample  
172 1µg of total RNA spiked with 1.2ng Sequins (v2) controls<sup>44</sup> was used to generate



173 RNA-seq paired-end libraries with the Illumina TruSeq Stranded Total RNA kit.  
174 Ribosomal RNA was removed with the Ribo-Zero Human/Mouse/Rat kit.  
175 Libraries were multiplexed and sequenced on an Illumina HiSeq 2500 instrument  
176 for 101 cycles.

## 177 Bioinformatics

178 Whole exome sequence data was analyzed in house <sup>43</sup> and whole genome data  
179 was analyzed in collaboration with the Broad Institute of MIT and Harvard using  
180 methodology described previously <sup>20</sup>. Briefly, BWA was used for alignment.  
181 GATK was used for single nucleotide polymorphism and insertion/deletion calls.  
182 Additional variant annotation was performed using the Variant Effect Predictor  
183 (VEP) <sup>45</sup>. Variants of interest were limited to polymorphisms with less than 0.005  
184 allelic frequency in the gnomAD and ExAC databases <sup>8,9</sup>. Whole genome copy  
185 number analysis, with consideration of structural changes, was done using  
186 Genome STRiP 2.0 <sup>46</sup>.

187 For analyses of RNA-seq data, read quality was assessed with FastQC v0.11.3  
188 (Babraham Bioinformatics, Cambridge, UK) and MultiQC v1.2 <sup>47</sup>. Reads were  
189 aligned to the human genome version GRCh37 by the STAR v2.5.3a <sup>48</sup> aligner in  
190 two-pass mode within the sample and across replicates for each sample sets.

191 Annotations were derived from the Human GENCODE v19 (Ensemble74).

192 FeatureCount v1.5.2 <sup>49</sup> from the Subread package, was used to generate gene  
193 expression matrix with the following non-default settings, reads must be paired,  
194 both the pairs must be mapped, use only uniquely mapped reads, multi-mapped  
195 reads are not counted, chimeric reads are not counted and strand specificity

196 turned on. Anaquin<sup>50</sup> was further used to evaluate alignment sensitivity and gene  
197 expression. Here sensitivity indicates the fraction of annotated regions covered  
198 by alignments of the reads by STAR (Table S2). No limit of quantification or limit  
199 of detection was reported.

200 For discovery of novel or known alternative splicing events we used a  
201 combination of CASH v2.2.1<sup>51</sup> and MAJIQ v1.1.3a<sup>52</sup>. CASH was operated with  
202 default settings. MAJIQ was run with a minimum of 5 reads for junction detection  
203 and 10 reads for the calculation of delta percent spliced-in (dPSI). EdgeR  
204 (v3.2.2)<sup>53</sup> was used to perform differential gene expression with default settings.  
205 Data normalization was performed using trimmed mean of M-values (TMM).

206 Next, the raw read counts were converted to transcript per million (TPM)  
207 expression values. The Picard tools v1.87 and RSeQC v2.6.4<sup>54</sup> were used to  
208 calculate mean fragment length. The approach implemented in Kallisto<sup>55</sup> was  
209 used to convert raw reads to TPM values. An average TPM of the third lowest  
210 Sequins between test and control samples was calculated and used as cutoff.  
211 TPM values for the GTEx samples used in figure3 were downloaded from the  
212 GTEx portal. The human normal retina (HNR) samples<sup>56</sup> and the ENCODE skin  
213 samples were reanalyzed as described above. The ENCODE skin samples were  
214 used for the analysis performed with MAJIQ as they were generated with a  
215 stranded total RNA-seq library same as our RO samples. In contrast the GTEx  
216 samples were generated with an mRNA non-stranded library.

217

218 RT-PCR and cloning

219 RT-PCR was conducted using SuperScript IV first-Strand synthesis system  
220 (ThermoFisher Scientific, Waltham, MA). Exon 14b was amplified with primers F:  
221 GACATGTTGCTAAGATTGAAATCCGT from exon 14 and R:  
222 GACCCAGCTTTCAGAGTAACCAGAAC from exon 15 using Phusion  
223 polymerase (NEB, Ipswich, MA). The longer band containing exon14b was then  
224 excised from the gel and purified using Zymoclean gel DNA recovery kit  
225 (Zymoresearch, Irvine, CA) and cloned using pGEM-T Easy Vector System  
226 (Promega, Madison, WI). The plasmid was used in a transformation into  
227 Subcloning Efficiency DH5 $\alpha$  Competent Cells (Invitrogen, Carlsbad, CA). The  
228 plasmid was isolated with Zyppy Plasmid Miniprep Kit (Zymoresearch, Irvine,  
229 CA). All procedures described in this section were conducted according to the  
230 manufacturer instructions. The DNA sequence of Exon 14b was found to be:  
231 GCCAGGTGCAGTGGCTCACGACTGTAATTCCAACACTTTGGGAGGCCAAGG  
232 TGGCAGGATCACATAAGTCCAGGAGTTCAAGACAAGCCTGGACAACATG.

233

## 234 Results

### 235 Unresolved genetic analysis of family OGI-081

236 The pilot study reported here was conducted on a five member family with two  
237 siblings shown by clinical testing to be affected by a cone dysfunction syndrome  
238 (Figure1a). Both affected patients had nystagmus and decreased vision from  
239 infancy and at age 8, OGI-081-197 was also noted to have photophobia. Visual  
240 acuity for both affected patients measured 20/150-200 and remained stable for 3  
241 years. Full field electroretinogram (ffERG) testing of retinal function for OGI-081-  
242 197 was significant for reduced and delayed cone photoreceptor responses, with  
243 normal rod photoreceptor response amplitudes. Optical coherence tomography  
244 (OCT) imaging of the retina showed retinal degenerative changes in the fovea  
245 (Figure1b). In addition to their retinal disease, both affected patients were found  
246 to have Chiari malformations. Interestingly, vision phenotypes such as  
247 photophobia, vision loss and nystagmus have been reported as accompanying  
248 symptoms in some forms of Chiari malformations<sup>57-60</sup>. Unfortunately, despite  
249 evidence that Chiari malformations have a heritable component<sup>61-63</sup>, the  
250 genes involved are not yet well defined<sup>59,64,65</sup>. For that reason we could not rule  
251 out the possibility that the vision phenotypes and Chiari malformations share a  
252 common genetic causality.

253 The phenotypes segregation in OGI-081 is indicative of a recessive mode of  
254 inheritance. Thus, for genetic testing we searched for genes that have putatively  
255 pathogenic variants in both alleles (Figure1a). Selective exon capture based

256 genetic diagnostic testing was performed using the Genetic Eye Disease (GEDi)  
257 test<sup>42</sup>. Since this did not identify a clear cause of disease, whole exome  
258 sequencing (WES) for the five members of the family was performed. Both the  
259 GEDi testing and WES identified a single rare variant in the *CNGB3* gene  
260 (c.1148delC, p.Thr383IlefsTer13) which has been reported to be pathogenic<sup>66–68</sup>,  
261 but a second rare variant in *CNGB3* was not identified, nor were other potential  
262 causative genetic variants forthcoming for the two affected members of the  
263 family. *CNGB3* mutations are among the most common causes of cone  
264 dysfunction syndrome, but to the best of our knowledge, Chiari malformations  
265 have not been reported as an accompanying symptom in *CNGB3* patients<sup>69,70</sup>.  
266 Moreover, the  $1.75e^{-3}$  gnomAD allele frequency of the p.Thr383IlefsTer13 variant  
267 is higher than expected for recessive pathogenic variants and two homozygous  
268 individuals are reported in the gnomAD database. Since it has been proposed  
269 that up to 1 in 4-5 individuals in the general population may be a carrier of null  
270 mutations in IRD genes<sup>71</sup> it was possible that the presence of variant  
271 p.Thr383IlefsTer13 was an incidental finding.

272 We therefore decided to test for two possible disease scenarios. One is that  
273 *CNGB3* accounts for the cone dysfunction syndrome and the second allele is a  
274 non-coding variant. In this case the Chiari malformation has a separate,  
275 unrelated causality. The second possibility is that a novel disease-causing gene  
276 is responsible for both the cone dysfunction syndrome and the Chiari  
277 malformation. To test these hypotheses, we performed both whole genome  
278 sequencing (WGS) and RNA-seq analysis of a surrogate retinal tissue to

279 determine whether the combination of these orthogonal investigations could yield  
280 a clear genetic solution.

281 Analysis of DNA variants detected by WGS identified 3268 segregating rare  
282 variants that could be sorted into 8191 allelic pairs in 642 genes (TableS3). The  
283 variant ranked at the top of the list of potential causes of disease remained the  
284 known pathogenic variant c.1148delC; p.Thr383IlefsTer13 in the *CNGB3* gene.  
285 However, a second coding variant once again was not found in this gene. Next,  
286 we set to establish a clinically relevant surrogate transcriptome for the human  
287 retina.

288 The iPSC-derived retinal organoid (RO) transcriptome can be used as a  
289 surrogate for a human retinal biopsy

290 Patient-derived iPSCs were generated from peripheral blood monocytes of all  
291 members of family OGI-081 excluding OGI-081-199. The iPSCs were subjected  
292 to an *in vitro* differentiation process to generate ROs with attached RPE (Figure  
293 2a)<sup>30</sup>. RPE was specifically retained in the ROs so as to concurrently identify  
294 potential mutations in RPE genes as well as photoreceptor genes (Figure2b).  
295 The ROs were kept in culture for 160 days (early stage 3<sup>30</sup>), a time point at  
296 which outer segments are visible by light microscopy and cone and rod cells are  
297 clearly distinguished by immunocytochemistry (Figure2b, c-h). At da160, ROs  
298 were harvested for total RNA isolation, library preparation, and RNA-seq analysis  
299 (Table1).

300 In order to evaluate if day 160 ROs can be used as informative surrogates for the  
301 adult human retinal transcriptome, we examined the expression levels of 270  
302 known IRD genes reported in the RetNet database. For this analysis, we  
303 compared an in-house dataset composed of 3 post-mortem human normal  
304 retinas (HNR, N=3)<sup>56</sup> to ROs derived from the unaffected sibling (N=5) or skin or  
305 whole blood samples taken from the GTEx database (Figure 3 and Table S4)<sup>21</sup>.  
306 Skin and blood represent tissues that are more readily available – and thus  
307 commonly used – for surrogate diagnostic testing. We found 224 IRD genes to  
308 be expressed in HNR (TPM>1). Interestingly we were able to detect expression  
309 of 254 IRD disease genes in the RO samples (Figure 3 and TableS4). The higher  
310 detection rate of disease-causing genes in ROs compared to HNR is most likely  
311 because of overall higher TPM values in RO samples (Figure 3a&b), possibly  
312 due to higher RNA quality compared to post-mortem HNR samples. In addition,  
313 the presence of RPE and photoreceptors with varied maturation statuses in the  
314 RO samples could be contributing factors to this finding. As expected, skin and  
315 blood expressed lower numbers of IRD genes (188 & 130 respectively) at much  
316 lower TPM values (Figure 3a&b and Table S4). Since IRD genes were very  
317 poorly represented in the blood samples, we excluded blood from further  
318 analysis.

319 We next examined the complexity of the HNR, RO and skin transcriptomes,  
320 which is reflected by the multitude of isoforms that are produced from each gene  
321 locus<sup>72,73</sup>. Isoform diversity that occurs via alternative splicing of the pre-mRNA  
322 can be represented by the splice junctions detected in each gene locus. We used

323 the MAJIQ<sup>52</sup> algorithm to detect splice junctions in HNR and RO samples of the  
324 OGI-081 unaffected sibling, and the ENCODE database<sup>74,75</sup> to detect splice  
325 junctions in corresponding skin samples. The skin samples from the ENCODE  
326 database were more suited for this analysis than the GTEx samples due to RNA-  
327 seq library type (see Materials and Methods). We found a comparable number of  
328 splice junctions in the HNR and RO samples (41,121 and 31,535 (76%)  
329 respectively) but a much lower number in the skin samples (16,713 (40%))  
330 (Figure 3c and TableS5). This result is probably due to the fact that HNR and  
331 ROs are composed of a more diverse cell population than skin. More importantly,  
332 in IRD genes, the gap in complexity between the HNR (946 junctions) and ROs  
333 (739 (78%)) as compared to skin (227(24%)) is even greater (Figure 3d & Table  
334 S5). Thus, the RO transcriptome provided a close facsimile of the human retinal  
335 and IRD transcriptomes at the gene expression and splicing pattern levels,  
336 whereas the skin transcriptome did not.

### 337 Detection of a novel non-coding pathogenic variant in *CNGB3*

338 In order to find the underlying genetic cause of the retinal degeneration in OGI-  
339 081 affected patients, we conducted differential splicing and gene expression  
340 analyses of the RNA-seq data obtained from day 160 ROs of affected versus  
341 unaffected siblings. The differential splicing analysis was conducted with CASH  
342<sup>51</sup> and MAJIQ<sup>52</sup> algorithms, and we used edgeR algorithm<sup>53</sup> for differential gene  
343 expression. CASH detected 106 differential splicing events in 101 genes (Table  
344 S6), while MAJIQ detected 522 differential splicing junctions in 260 genes (Table  
345 S7). A comparison to the 642 genes with DNA variant pairs indicated that only



346 two genes, *CNGB3* and *NCALD*, had altered splicing patterns and a DNA variant  
347 in each of their alleles that segregated according to disease status in OGI-081  
348 (Figure 4a).

349 For the *NCALD* gene, the alternative splicing events identified by CASH and  
350 MAJIQ were isoform switching events between minor isoforms (data not shown)  
351 whose biological significances are unclear. In addition, the DNA variants in this  
352 gene are located 15-50kb away from the nearest alternative junction (Figure 4b  
353 and Table S8). Given such large distances, it is not likely that these variants  
354 could cause the alternative splicing events. Moreover, the differential gene  
355 expression analysis did not find the *NCALD* gene to be differentially expressed  
356 between the affected and unaffected siblings (Table S9). Taken together, these  
357 results indicate that the *NCALD* gene variants are most likely not the genetic  
358 cause for the disease phenotypes observed in OGI-081.

359 We next examined the *CNGB3* gene locus. Based on segregation in the family,  
360 we found one allele carrying the intronic variant chr8:g.87618576G>A while the  
361 second allele carried the known pathogenic variant c.1148delC;  
362 p.Thr383IlefsTer13, and a second intronic variant chr8:g.87676221T>C (Table  
363 S3). Both MAJIQ and CASH detected an alternative splicing event spanning  
364 variant chr8:g.87618576G>A. In contrast, no alternative splicing events were  
365 found to span variant chr8:g.87676221T>C (Figure4b and TableS6-8). Close  
366 examination of the alternative splicing event spanning variant  
367 chr8:g.87618576G>A revealed that it incorporated a cryptic exon into *CNGB3* in  
368 RNA samples taken from both affected siblings but not from the unaffected

369 sibling (Figure 5a&b). The cryptic exon is spliced between canonical exon 14 and  
370 exon 15 and will therefore be termed exon14b from hereon. The inclusion of  
371 exon 14b was validated by RT-PCR and subsequent cloning and Sanger  
372 sequencing of the novel longer isoform from the two affected siblings (Figure 5b).

373 Both the addition of exon 14b to the *CNGB3* transcript as a result of variant  
374 chr8:g.87618576G>A, and the single base pair deletion in the second allele  
375 carrying variant c.1148delC; p.Thr383IlefsTer13, lead to a frame shift and  
376 subsequent premature termination. We therefore expected both alleles to  
377 undergo nonsense mediated decay (NMD) with down regulation of *CNGB3*  
378 mRNA levels in the affected siblings as compared to the unaffected sibling.  
379 However, contrary to our expectations, *CNGB3* expression was not significantly  
380 down regulated in our RNA-seq dataset, as analyzed using the edgeR program.  
381 A comparison of each of the affected siblings with the unaffected sibling yielded  
382 log<sub>2</sub>FC values of -1.05 and -1.13, indicating slightly lower expression levels in the  
383 affected siblings that did not reach statistical significance (p-values of 0.13 and  
384 0.16 respectively (Table S9)). These two frame shift alleles are predicted to  
385 encode truncated proteins. The protein encoded by the exon 14b including  
386 isoform is predicted to maintaining a full transmembrane domain but lack the  
387 ligand binding domain of *CNGB3* (Figure 5c). Similarly, the protein encoded by  
388 the isoform carrying the known pathogenic variant c.1148delC;  
389 p.Thr383IlefsTer13 is predicted to have a truncated transmembrane domain in  
390 addition to lacking the ligand binding domain (Figure 5c). In order to determine  
391 whether the truncated *CNGB3* proteins are being translated, we performed

392 immunohistochemistry on ROs from the exon 14b allele carrier parent (OGI-081-  
393 200) and one affected sibling (OGI-081-197, Figure 6). CNGB3 is a subunit of the  
394 cone cyclic nucleotide-gated (CNG) channel, which localizes to cone  
395 photoreceptor outer segments in chicken and mice<sup>76,77</sup>. We have also validated  
396 the localization of human CNGB3 to cone photoreceptor outer segments in the  
397 human retina (Figure S2). We therefore immunostained ROs for CNGB3 and ML  
398 opsin, the latter serving as a marker for photoreceptor outer segments. For these  
399 studies, stage 3 ROs were kept in culture for a total of 262 days, allowing cones  
400 full opportunity to mature and localize ML opsin and CNGB3 to the photoreceptor  
401 outer segments. As expected, CNGB3 co-localized with ML opsin in cone  
402 photoreceptor outer segments in the parent (Figure 6c), with weaker staining  
403 observed in inner segments as well (Figure 6b&c), presumably due to  
404 mislocalization of truncated CNGB3 protein produced by the exon 14b including  
405 allele. In ROs from the affected sibling, where both alleles are predicted to result  
406 in truncated proteins, CNGB3 was only observed diffusely in the cell body and in  
407 inner segments; i.e., no co-localization with ML opsin was observed in cone  
408 photoreceptor outer segments (Figure 6e&f). Taken together, results from the  
409 differential splicing analysis indicate that the likely cause for the inherited retinal  
410 degeneration in OGI-081 is two pathogenic alleles in *CNGB3* - the known  
411 pathogenic allele p.Thr383IlefsTer13 and the novel deep intronic allele  
412 chr8:g.87618576G>A; NM\_019098.3:c.1663 – 2137C>T; pLeu524IlefsTer50.

413

#### 414 Splicing prediction algorithms

415 With the identification of the non-coding pathogenic variant in *CNGB3*, we set out  
416 to examine the mechanism by which it promotes the inclusion of exon 14b. We  
417 analyzed the splice junctions surrounding exon14b with the variant analysis tool  
418 Alamut Visual. Alamut Visual incorporates three splicing predictors capable of  
419 analyzing deep intronic variants, SpliceSiteFinder-like (SSF)<sup>78</sup>, MaxEntScan<sup>79</sup>  
420 and NNSPLICE<sup>80</sup>. All three algorithms predicted chr8:g.87618576G>A to  
421 strengthen a cryptic donor splice site (DSS) (Table 2). All three algorithms also  
422 detected a potential acceptor splice site (ASS) at position c.1663-2238, exactly  
423 where our Sanger sequencing indicated the acceptor site of exon 14b resides.  
424 Interestingly, exon 14b ASS is a stronger than the one located at exon 15 (Table  
425 2). It is plausible that the availability of this acceptor site and its ability to compete  
426 with the acceptor site of exon 15 contributed to the effect of variant  
427 chr8:g.87618576G>A on the splicing pattern of *CNGB3* in the affected siblings. In  
428 addition we noticed the presence of a second even stronger alternative ASS  
429 54bp upstream of exon 15 ASS. It is possible that this secondary competitor  
430 further weakens the exon 15 ASS thus enhancing the effects of variant  
431 chr8:g.87618576G>A.

432 Next, using OGI-081 as a true positive case, we tested whether splicing  
433 prediction algorithms could be used to prioritize candidate non-coding splicing  
434 altering variants, circumventing the need for RNA-seq analysis. We annotated  
435 the 3,268 rare variants with allelic pairs identified in OGI-081 with two splicing  
436 prediction programs. (i). Alamut Batch that makes its prediction by the combined

437 calculations of the same splicing predictions algorithms as Alamut visual but is  
438 capable of calculating the effects of multiple variants. (ii). SpliceAI, a deep neural  
439 network tool, to predict splice junctions from pre-mRNA transcript sequence <sup>18</sup>.  
440 Alamut batch calculated a high probability for altering splicing for 532 variants in  
441 315 genes (Table S10). Although variant chr8:g.87618576G>A, the novel  
442 pathogenic variant identified in this study, was predicted by Alamut Batch to  
443 strongly activate a cryptic donor site the large number of additional candidate  
444 variants make this tool too cumbersome for identification of candidate non-coding  
445 pathogenic variants. For SpliceAI, to identify synonymous exonic, near intronic,  
446 and deep intronic variants predicted to affect splicing at a validation rate of 40%  
447 the authors used  $\Delta$  Score greater than or equal to 0.2, 0.2, and 0.5 respectively.  
448 Out of the variants segregating in OGI-081 only eight had scores  $0.2 < 0.5$  and only  
449 one, variant Chr9:g.86536129C>T, received a  $\Delta$  Score  $> 0.5$  (Table S11). Variant  
450 chr8:g.87618576G>A, the novel pathogenic variant identified in this study as  
451 activating a cryptic donor splice site, was calculated by SpliceAI to have a donor  
452 gain  $\Delta$  Score of 0.3 well below the 0.5 cutoff for deep intronic variants. Thus, had  
453 we used SpliceAI splicing predictions as a filter to identify potential causal  
454 variants for functional validations, variant chr8:g.87618576G>A would have been  
455 overlooked. The ASS of exon 14b was not identified by either algorithm and  
456 therefore could not have been used to highlight variant chr8:g.87618576G>A as  
457 a more plausible pathogenic variant.

458

## 459 Discussion

460 We present here an unbiased approach based on the combination of WGS and  
461 RNA-seq data to identify and functionally validate pathogenic non-coding variants  
462 without the use of large datasets. We show that *ex vivo* models, such as iPSC  
463 derived ROs, can serve as a surrogate source of a patient's own retinal tissue for  
464 RNA and protein analyses. IRDs are currently at the focus of gene therapy  
465 advances and several clinical trials are underway, including a trial for *CNGB3*  
466 gene augmentation therapy<sup>6</sup>. This work was aimed at expanding the number of  
467 patients eligible for clinical trials and forthcoming therapies. Indeed, our findings  
468 here make the two affected siblings of OGI-081 eligible to participate in ongoing  
469 clinical trials for *CNGB3* gene therapy. Our approach is applicable to any  
470 inherited disease, both WGS and RNA-seq techniques are commercially  
471 available, gold standards are being established and the analysis tools are readily  
472 accessible<sup>47,48,82,49-55,81</sup>. *Ex vivo* organoid models are being developed for a  
473 multitude of tissues including brain<sup>83,84</sup>, kidney<sup>85</sup>, liver<sup>86,87</sup> and lung<sup>88</sup>.

474 Non-coding variants present a challenge for a correct genetic diagnosis that is  
475 imperative for a successful genetic therapy. The combination of WGS and RNA-  
476 seq methodologies allows us to both detect non-coding variants and evaluate  
477 their functionality throughout the genome. Indeed, a similar approach has already  
478 been successfully employed to diagnose diseases where RNA could be  
479 harvested from biopsies of disease-relevant tissue<sup>19,20</sup>. These studies relied on  
480 the availability of large control datasets of RNA-seq samples from unaffected

481 individuals and/or a large cohort of patients<sup>19,20</sup>. Our work shows that the correct  
482 diagnosis of non-coding variants is possible without reliance on such resources.  
483 WGS analysis of all five members of OGI-081 and segregation analysis of the  
484 variants within the family narrowed down the search from tens of thousands of  
485 variants to a few hundred with allelic pairs. We then used RNA-seq analysis  
486 comparing two affected siblings to an unaffected one as an orthogonal approach  
487 to identify genes with altered splicing or expression in disease. Thus identifying  
488 the deep intronic variant chr8:g.87618576G>A as a novel pathogenic variant in  
489 the *CNGB3* gene. The iPSC derived ROs served both as a source of disease  
490 relevant transcriptome and as a system for functional validation of the truncated  
491 proteins. In future studies, for families with a single patient the parents may serve  
492 as control samples, so that each parent controls for the effect of the allele  
493 inherited from the other parent making our approach applicable even for ultra-  
494 rare diseases.

495 Once the deep intronic variant was detected and validated we were able to use  
496 that prior knowledge to identify additional factors that may have contributed to the  
497 inclusion of exon 14b such as the availability of the cryptic acceptor site of exon  
498 14b and the comparative weakness of the exon 15 acceptor site. Such complex  
499 dependencies are a prime example as to why sequence based predictions of  
500 splicing patterns are hard to compute. Still, several splicing predictors in the  
501 Alamut Visual software were able to detect the increase in the splicing probability  
502 of the cryptic donor site as a result of variant chr8:g.87618576G>A. This  
503 prompted us to test whether such splicing predictors can be used as preliminary

504 filters to identify candidate pathogenic variants for “gene by gene” validation  
505 methods, circumventing the need for RNA-seq analysis of ROs. We found that  
506 the more established approach represented by the Alamut Batch method of  
507 combining the calculations of several splicing predictors that are designed to  
508 identify known splicing motifs yielded too many candidates for gene by gene  
509 validation. In contrast, the more recent approach of deep neuronal networks  
510 algorithms, represented by SpliceAI, failed to assign high probability to the true  
511 positive variant chr8:g.87618576G>A. Still, in cases where some prior knowledge  
512 can help prioritize variants or highlight ones with lower than expected scores  
513 these methods may yet be helpful. In cases where no prior knowledge can help  
514 prioritize candidate variants, such as in patients where both pathogenic alleles  
515 are non-coding, and especially in cases where a cell type relevant for functional  
516 validation is not available, the approach established here is preferable.

## 517 Appendices

### 518 Differential gene expression analysis

519 As mentioned above, differential gene expression analysis was less informative  
520 in the OGI-081 datasets. We compared gene expression levels from each of the  
521 affected siblings to that of the unaffected sibling (Table S9). We found 401 genes  
522 to be consistently down regulated, of which 27 were Y linked as expected given  
523 that the two affected siblings are females while the unaffected sibling is a male.  
524 We excluded these Y linked genes from further analysis. Tools are not currently  
525 available to filter out non-Y linked genes that may be differentially expressed



526 between the sexes under normal conditions in ROs. Of the remaining 374 down  
527 regulated genes, 29 also contained allelic variant pairs (Table S3). In addition,  
528 we found 1120 genes to be consistently up regulated between the two affected  
529 siblings and the unaffected sibling (Table S9). Of the up regulated genes, 15 also  
530 contained allelic variant pairs (Table S3). None of the 44 differentially expressed  
531 genes with allelic variant pairs are reported in RetNet as IRD genes.

## 532 Supplemental Data

533 Supplemental data includes two figures and 11 tables.

## 534 Acknowledgments

535 The authors would like to thank the OGI-081 family for their participation in this  
536 study. We thank the members of the Ocular Genomics Institute Genomics Core  
537 facility for their assistance with sequencing analyses. We would like to thank  
538 Beryl Cumming for help generating the Sashimi plot in figure 2. This work was  
539 supported by grants from the National Eye Institute [R01EY012910 (EAP),  
540 R01EY026904 (KMB/EAP) and P30EY014104 (MEEI core support)], and the  
541 Foundation Fighting Blindness (EGI-GE-1218-0753-UCSD, KMB/EAP). DMG  
542 was supported by Foundation Fighting Blindness (BR-GE-1213-0632-UWI),  
543 Sandra Lemke Trout Chair in Eye Research, RRF Emmett A Humble  
544 Distinguished Directorship, McPherson Eye Research Institute, Research to  
545 Prevent Blindness. We acknowledge the Genotype-Tissue Expression (GTEx)  
546 Project that was supported by the Common Fund of the Office of the Director of  
547 the National Institutes of Health, and by NCI, NHGRI, NHLBI, NIDA, NIMH, and

548 NINDS. We acknowledge the ENCODE Consortium and the Thomas Gingeras,  
549 CSHL production lab for the use of skin RNA-seq samples ENCSR551NII,  
550 ENCSR991HIR, ENCSR460YCS and ENCSR321PGV.

## 551 Declaration of Interests

552 The authors declare no competing interests.

## 553 Web Resources

554 ENCODE <https://www.encodeproject.org/experiments/ENCSR551NII/>

555 ExAC <http://exac.broadinstitute.org/>

556 gnomAD <http://gnomad.broadinstitute.org/>

557 GTEx Portal <https://gtexportal.org/home/>

558 Picard tools <http://broadinstitute.github.io/picard/>

559 RetNet <http://www.sph.uth.tmc.edu/RetNet/>

## 560 Accession Numbers

561 The accession numbers for the RNAseq samples reported in this paper  
562 (BioProject: PRJNA564377) are:

563 SRA:SRR10082823

564 SRA:SRR10082822

565 SRA:SRR10082821

566 SRA:SRR10082828

567 SRA:SRR10082829

568 SRA:SRR10082824

569 SRA:SRR10082830

570 SRA:SRR10082827

571 SRA:SRR10082826

572 SRA:SRR10082825

573 SRA:SRR10082820

574

## 575 References

576 1. Sahel, J.A., Marazova, K., and Audo, I. (2015). Clinical characteristics and  
577 current therapies for inherited retinal degenerations. Cold Spring Harb. Perspect.  
578 Med.

579 2. Maguire, A.M., Simonelli, F., Pierce, E.A., Pugh, E.N., Mingozzi, F., Bencicelli,  
580 J., Banfi, S., Marshall, K.A., Testa, F., Surace, E.M., et al. (2008). Safety and  
581 efficacy of gene transfer for Leber's congenital amaurosis. N. Engl. J. Med. 358,  
582 2240–2248.

583 3. Hauswirth, W.W., Aleman, T.S., Kaushal, S., Cideciyan, A. V., Schwartz, S.B.,  
584 Wang, L., Conlon, T.J., Boye, S.L., Flotte, T.R., Byrne, B.J., et al. (2008).  
585 Treatment of Leber congenital amaurosis due to RPE65 mutations by ocular  
586 subretinal injection of adeno-associated virus gene vector: Short-term results of a

- 587 phase I trial. *Hum. Gene Ther.* 19, 979–990.
- 588 4. Bainbridge, J.W.B., Smith, A.J., Barker, S.S., Robbie, S., Henderson, R.,  
589 Balaggan, K., Viswanathan, A., Holder, G.E., Stockman, A., Tyler, N., et al.  
590 (2008). Effect of gene therapy on visual function in Leber’s congenital amaurosis.  
591 *N. Engl. J. Med.* 358, 2231–2239.
- 592 5. Kannabiran, C., and Mariappan, I. (2018). Therapeutic avenues for hereditary  
593 forms of retinal blindness. *J. Genet.* 97, 341–352.
- 594 6. Moore, N.A., Morral, N., Ciulla, T.A., and Bracha, P. (2018). Gene therapy for  
595 inherited retinal and optic nerve degenerations. *Expert Opin. Biol. Ther.*
- 596 7. Scholl, H.P.N., Strauss, R.W., Singh, M.S., Dalkara, D., Roska, B., Picaud, S.,  
597 and Sahel, J.A. (2016). Emerging therapies for inherited retinal degeneration.  
598 *Sci. Transl. Med.*
- 599 8. Lek, M., Karczewski, K.J., Minikel, E. V., Samocha, K.E., Banks, E., Fennell,  
600 T., O’Donnell-Luria, A.H., Ware, J.S., Hill, A.J., Cummings, B.B., et al. (2016).  
601 Analysis of protein-coding genetic variation in 60,706 humans. *Nature.*
- 602 9. Karczewski, K.J., Francioli, L.C., Tiao, G., Cummings, B.B., Alföldi, J., Wang,  
603 Q., Collins, R.L., Laricchia, K.M., Ganna, A., Birnbaum, D.P., et al. (2019).  
604 Variation across 141,456 human exomes and genomes reveals the spectrum of  
605 loss-of-function intolerance across human protein-coding genes. *BioRxiv* 531210.
- 606 10. Vaz-Drago, R., Custódio, N., and Carmo-Fonseca, M. (2017). Deep intronic  
607 mutations and human disease. *Hum. Genet.* 136, 1093–1111.
- 608 11. Zhang, F., and Lupski, J.R. (2015). Non-coding genetic variants in human

- 609 disease: Figure 1. *Hum. Mol. Genet.* *24*, R102–R110.
- 610 12. Khurana, E., Fu, Y., Chakravarty, D., Demichelis, F., Rubin, M.A., and  
611 Gerstein, M. (2016). Role of non-coding sequence variants in cancer. *Nat. Rev.*  
612 *Genet.* *17*, 93–108.
- 613 13. Gloss, B.S., and Dinger, M.E. (2018). Realizing the significance of noncoding  
614 functionality in clinical genomics. *Exp. Mol. Med.*
- 615 14. Anna, A., and Monika, G. (2018). Splicing mutations in human genetic  
616 disorders: examples, detection, and confirmation.
- 617 15. Ohno, K., Takeda, J.-I., and Masuda, A. (2018). Rules and tools to predict  
618 the splicing effects of exonic and intronic mutations.
- 619 16. Cheng, J., Nguyen, T.Y.D., Cygan, K.J., Celik, M.H., Fairbrother, W.G.,  
620 Avsec, Z., and Gagneur, J. (2019). MMSplice: modular modeling improves the  
621 predictions of genetic variant effects on splicing. *Genome Biol.* *20*, 48.
- 622 17. Jagadeesh, K.A., Paggi, J.M., Ye, J.S., Stenson, P.D., Cooper, D.N.,  
623 Bernstein, J.A., and Bejerano, G. (2018). S-CAP extends clinical-grade  
624 pathogenicity prediction to genetic variants that affect RNA splicing. *BioRxiv*.
- 625 18. Jaganathan, K., Kyriazopoulou Panagiotopoulou, S., McRae, J.F., Darbandi,  
626 S.F., Knowles, D., Li, Y.I., Kosmicki, J.A., Arbelaez, J., Cui, W., Schwartz, G.B.,  
627 et al. (2019). Predicting Splicing from Primary Sequence with Deep Learning.  
628 *Cell* *176*, 535-548.e24.
- 629 19. Evrony, G.D., Cordero, D.R., Shen, J., Partlow, J.N., Yu, T.W., Rodin, R.E.,  
630 Hill, R.S., Coulter, M.E., Lam, A.T.N., Jayaraman, D., et al. (2017). Integrated

- 631 genome and transcriptome sequencing identifies a noncoding mutation in the  
632 genome replication factor DONSON as the cause of microcephaly-micromelia  
633 syndrome. *Genome Res.*
- 634 20. Cummings, B.B., Marshall, J.L., Tukiainen, T., Lek, M., Donkervoort, S.,  
635 Foley, A.R., Bolduc, V., Waddell, L.B., Sandaradura, S.A., O'Grady, G.L., et al.  
636 (2017). Improving genetic diagnosis in Mendelian disease with transcriptome  
637 sequencing. *Sci. Transl. Med.*
- 638 21. Lonsdale, J., Thomas, J., Salvatore, M., Phillips, R., Lo, E., Shad, S., Hasz,  
639 R., Walters, G., Garcia, F., Young, N., et al. (2013). The Genotype-Tissue  
640 Expression (GTEx) project. *Nat. Genet.*
- 641 22. Ratnapriya, R., Sosina, O.A., Starostik, M.R., Kwicklis, M., Kapphahn, R.J.,  
642 Fritsche, L.G., Walton, A., Arvanitis, M., Gieser, L., Pietraszkiewicz, A., et al.  
643 (2019). Retinal transcriptome and eQTL analyses identify genes associated with  
644 age-related macular degeneration. *Nat. Genet.*
- 645 23. Aguet, F., Brown, A.A., Castel, S.E., Davis, J.R., He, Y., Jo, B., Mohammadi,  
646 P., Park, Y.S., Parsana, P., Segrè, A. V., et al. (2017). Genetic effects on gene  
647 expression across human tissues. *Nature.*
- 648 24. Danino, Y.M., Even, D., Ideses, D., and Juven-Gershon, T. (2015). The core  
649 promoter: At the heart of gene expression. *Biochim. Biophys. Acta - Gene Regul.*  
650 *Mech.* *1849*, 1116–1131.
- 651 25. Rickels, R., and Shilatifard, A. (2018). Enhancer Logic and Mechanics in  
652 Development and Disease. *Trends Cell Biol.* *28*, 608–630.

- 653 26. Herzelt, L., Ottoz, D.S.M., Alpert, T., and Neugebauer, K.M. (2017). Splicing  
654 and transcription touch base: co-transcriptional spliceosome assembly and  
655 function. *Nat. Rev. Mol. Cell Biol.* 18, 637–650.
- 656 27. Ramanouskaya, T. V., and Grinev, V. V. (2017). The determinants of  
657 alternative RNA splicing in human cells. *Mol. Genet. Genomics* 292, 1175–1195.
- 658 28. Gonorazky, H., Liang, M., Cummings, B., Lek, M., Micallef, J., Hawkins, C.,  
659 Basran, R., Cohn, R., Wilson, M.D., MacArthur, D., et al. (2016). RNAseq  
660 analysis for the diagnosis of muscular dystrophy. *Ann. Clin. Transl. Neurol.* 3,  
661 55–60.
- 662 29. Gonorazky, H.D., Naumenko, S., Ramani, A.K., Nelakuditi, V., Mashouri, P.,  
663 Wang, P., Kao, D., Ohri, K., Viththiyapaskaran, S., Tarnopolsky, M.A., et al.  
664 (2019). Expanding the Boundaries of RNA Sequencing as a Diagnostic Tool for  
665 Rare Mendelian Disease. *Am. J. Hum. Genet.* 104, 466–483.
- 666 30. Capowski, E.E., Samimi, K., Mayerl, S.J., Phillips, M.J., Pinilla, I., Howden,  
667 S.E., Saha, J., Jansen, A.D., Edwards, K.L., Jager, L.D., et al. (2019).  
668 Reproducibility and staging of 3D human retinal organoids across multiple  
669 pluripotent stem cell lines. *Development* 146, dev171686.
- 670 31. Gonzalez-Cordero, A., Kruczek, K., Naeem, A., Fernando, M., Kloc, M.,  
671 Ribeiro, J., Goh, D., Duran, Y., Blackford, S.J.I., Abelleira-Hervas, L., et al.  
672 (2017). Recapitulation of Human Retinal Development from Human Pluripotent  
673 Stem Cells Generates Transplantable Populations of Cone Photoreceptors. *Stem*  
674 *Cell Reports*.

- 675 32. Meyer, J.S., Shearer, R.L., Capowski, E.E., Wright, L.S., Wallace, K.A.,  
676 McMillan, E.L., Zhang, S.C., and Gamm, D.M. (2009). Modeling early retinal  
677 development with human embryonic and induced pluripotent stem cells. Proc.  
678 Natl. Acad. Sci. U. S. A.
- 679 33. Meyer, J.S., Howden, S.E., Wallace, K.A., Verhoeven, A.D., Wright, L.S.,  
680 Capowski, E.E., Pinilla, I., Martin, J.M., Tian, S., Stewart, R., et al. (2011). Optic  
681 vesicle-like structures derived from human pluripotent stem cells facilitate a  
682 customized approach to retinal disease treatment. Stem Cells.
- 683 34. Nakano, T., Ando, S., Takata, N., Kawada, M., Muguruma, K., Sekiguchi, K.,  
684 Saito, K., Yonemura, S., Eiraku, M., and Sasai, Y. (2012). Self-formation of optic  
685 cups and storable stratified neural retina from human ESCs. Cell Stem Cell.
- 686 35. Phillips, M.J., Wallace, K.A., Dickerson, S.J., Miller, M.J., Verhoeven, A.D.,  
687 Martin, J.M., Wright, L.S., Shen, W., Capowski, E.E., Percin, E.F., et al. (2012).  
688 Blood-derived human iPS cells generate optic vesicle-like structures with the  
689 capacity to form retinal laminae and develop synapses. Invest. Ophthalmol. Vis.  
690 Sci.
- 691 36. Reichman, S., Terray, A., Slembrouck, A., Nanteau, C., Orieux, G., Habeler,  
692 W., Nandrot, E.F., Sahel, J.A., Monville, C., and Goureau, O. (2014). From  
693 confluent human iPS cells to self-forming neural retina and retinal pigmented  
694 epithelium. Proc. Natl. Acad. Sci. U. S. A.
- 695 37. Wahlin, K.J., Maruotti, J.A., Sripathi, S.R., Ball, J., Angueyra, J.M., Kim, C.,  
696 Grebe, R., Li, W., Jones, B.W., and Zack, D.J. (2017). Photoreceptor Outer



- 697 Segment-like Structures in Long-Term 3D Retinas from Human Pluripotent Stem  
698 Cells. *Sci. Rep.*
- 699 38. Zhong, X., Gutierrez, C., Xue, T., Hampton, C., Vergara, M.N., Cao, L.H.,  
700 Peters, A., Park, T.S., Zambidis, E.T., Meyer, J.S., et al. (2014). Generation of  
701 three-dimensional retinal tissue with functional photoreceptors from human  
702 iPSCs. *Nat. Commun.*
- 703 39. Cora, V., Haderspeck, J., Antkowiak, L., Mattheus, U., Neckel, P.H., Mack,  
704 A.F., Bolz, S., Ueffing, M., Pashkovskaia, N., Achberger, K., et al. (2019). A  
705 Cleared View on Retinal Organoids. *Cells* 8, 391.
- 706 40. Kim, S., Lowe, A., Dharmat, R., Lee, S., Owen, L.A., Wang, J., Shakoor, A.,  
707 Li, Y., Morgan, D.J., Hejazi, A.A., et al. (2019). Generation, transcriptome  
708 profiling, and functional validation of cone-rich human retinal organoids. *Proc.*  
709 *Natl. Acad. Sci.* 116, 10824–10833.
- 710 41. Capowski, E.E., Samimi, K., Mayerl, S.J., Phillips, M.J., Pinilla, I., Howden,  
711 S.E., Saha, J., Jansen, A.D., Edwards, K.L., Jager, L.D., et al. (2018).  
712 Reproducibility and staging of 3D human retinal organoids across multiple  
713 pluripotent stem cell lines. *Development* 146, dev171686.
- 714 42. Consugar, M.B., Navarro-Gomez, D., Place, E.M., Bujakowska, K.M., Sousa,  
715 M.E., Fonseca-Kelly, Z.D., Taub, D.G., Janessian, M., Wang, D.Y., Au, E.D., et  
716 al. (2015). Panel-based genetic diagnostic testing for inherited eye diseases is  
717 highly accurate and reproducible, and more sensitive for variant detection, than  
718 exome sequencing. *Genet. Med.* 17, 253–261.

- 719 43. Falk, M.J., Zhang, Q., Nakamaru-Ogiso, E., Kannabiran, C., Fonseca-Kelly,  
720 Z., Chakarova, C., Audo, I., MacKay, D.S., Zeitz, C., Borman, A.D., et al. (2012).  
721 NMNAT1 mutations cause Leber congenital amaurosis. *Nat. Genet.*
- 722 44. Hardwick, S.A., Chen, W.Y., Wong, T., Deveson, I.W., Blackburn, J.,  
723 Andersen, S.B., Nielsen, L.K., Mattick, J.S., and Mercer, T.R. (2016). Spliced  
724 synthetic genes as internal controls in RNA sequencing experiments. *Nat.*  
725 *Methods* 13, 792–798.
- 726 45. McLaren, W., Gil, L., Hunt, S.E., Riat, H.S., Ritchie, G.R.S., Thormann, A.,  
727 Flicek, P., and Cunningham, F. (2016). The Ensembl Variant Effect Predictor.  
728 *Genome Biol.*
- 729 46. Handsaker, R.E., Van Doren, V., Berman, J.R., Genovese, G., Kashin, S.,  
730 Boettger, L.M., and Mccarroll, S.A. (2015). Large multiallelic copy number  
731 variations in humans. *Nat. Genet.*
- 732 47. Ewels, P., Magnusson, M., Lundin, S., and Käller, M. (2016). MultiQC:  
733 summarize analysis results for multiple tools and samples in a single report.  
734 *Bioinformatics* 32, 3047–3048.
- 735 48. Dobin, A., Davis, C.A., Schlesinger, F., Drenkow, J., Zaleski, C., Jha, S.,  
736 Batut, P., Chaisson, M., and Gingeras, T.R. (2013). STAR: ultrafast universal  
737 RNA-seq aligner. *Bioinformatics* 29, 15–21.
- 738 49. Liao, Y., Smyth, G.K., and Shi, W. (2014). featureCounts: an efficient general  
739 purpose program for assigning sequence reads to genomic features.  
740 *Bioinformatics* 30, 923–930.

- 741 50. Wong, T., Deveson, I.W., Hardwick, S.A., and Mercer, T.R. (2017).  
742 ANAQUIN: a software toolkit for the analysis of spike-in controls for next  
743 generation sequencing. *Bioinformatics* 33, 1723–1724.
- 744 51. Wu, W., Zong, J., Wei, N., Cheng, J., Zhou, X., Cheng, Y., Chen, D., Guo, Q.,  
745 Zhang, B., and Feng, Y. (2018). CASH: a constructing comprehensive splice site  
746 method for detecting alternative splicing events. *Brief. Bioinform.* 19, 905–917.
- 747 52. Vaquero-Garcia, J., Barrera, A., Gazzara, M.R., González-Vallinas, J.,  
748 Lahens, N.F., Hogenesch, J.B., Lynch, K.W., and Barash, Y. (2016). A new view  
749 of transcriptome complexity and regulation through the lens of local splicing  
750 variations. *Elife* 5, e11752.
- 751 53. Robinson, M.D., McCarthy, D.J., and Smyth, G.K. (2010). edgeR: a  
752 Bioconductor package for differential expression analysis of digital gene  
753 expression data. *Bioinformatics* 26, 139–140.
- 754 54. Wang, L., Wang, S., and Li, W. (2012). RSeQC: quality control of RNA-seq  
755 experiments. *Bioinformatics* 28, 2184–2185.
- 756 55. Bray, N.L., Pimentel, H., Melsted, P., and Pachter, L. (2016). Near-optimal  
757 probabilistic RNA-seq quantification. *Nat. Biotechnol.* 34, 525–527.
- 758 56. Farkas, M.H., Grant, G.R., White, J. a, Sousa, M.E., Consugar, M.B., Pierce,  
759 E. a, and Genomics, B. (2013). Transcriptome analyses of the human retina  
760 identify unprecedented transcript diversity and 3.5 Mb of novel transcribed  
761 sequence via significant alternative splicing and novel genes. *BMC Genomics* 14,  
762 486.

- 763 57. Mossman, S.S., Bronstein, A.M., Gresty, M.A., Kendall, B., and Rudge, P.  
764 (1990). Convergence nystagmus associated with Arnold-Chiari malformation.  
765 *Arch. Neurol.* 47, 357–359.
- 766 58. Milhorat, T.H., Chou, M.W., Trinidad, E.M., Kula, R.W., Mandell, M., Wolpert,  
767 C., and Speer, M.C. (1999). Chiari I malformation redefined: clinical and  
768 radiographic findings for 364 symptomatic patients. *Neurosurgery* 44, 1005–  
769 1017.
- 770 59. Urbizu, A., Toma, C., Poca, M.A., Sahuquillo, J., Cuenca-León, E., Cormand,  
771 B., and Macaya, A. (2013). Chiari malformation type I: a case-control association  
772 study of 58 developmental genes. *PLoS One* 8, e57241.
- 773 60. Shaikh, A., and Ghasia, F. (2015). Neuro-ophthalmology of type Chiari  
774 malformation. *Expert Rev Ophthalmol* 10, 351–357.
- 775 61. Ray, C., Nagy, L., and Mobley, J. (2014). Familial aggregation of chiari  
776 malformation: presentation, pedigree, and review of the literature. *Turk.*  
777 *Neurosurg.* 26, 315–320.
- 778 62. Yuan, X.X., Li, Y., Sha, S.F., Sun, W.X., Qiu, Y., Liu, Z., Zhu, W.G., and Zhu,  
779 Z.Z. (2017). [Genetic analysis of posterior cranial fossa morphology in families of  
780 Chiari malformation type I]. *Zhonghua Yi Xue Za Zhi* 97, 1140–1144.
- 781 63. Sarnat, H.B. (2018). Cerebellar networks and neuropathology of cerebellar  
782 developmental disorders (Elsevier).
- 783 64. Merello, E., Tattini, L., Magi, A., Accogli, A., Piatelli, G., Pavanello, M.,  
784 Tortora, D., Cama, A., Kibar, Z., Capra, V., et al. (2017). Exome sequencing of

- 785 two Italian pedigrees with non-isolated Chiari malformation type I reveals  
786 candidate genes for cranio-facial development. *Eur. J. Hum. Genet.* 25, 952–959.
- 787 65. Solis-Moruno, M., de Manuel, M., Hernandez-Rodriguez, J., Fontsero, C.,  
788 Gomara-Castaño, A., Valsera-Naranjo, C., Crailsheim, D., Navarro, A., Llorente,  
789 M., Riera, L., et al. (2017). Potential damaging mutation in LRP5 from genome  
790 sequencing of the first reported chimpanzee with the Chiari malformation. *Sci.*  
791 *Rep.* 7, 15224.
- 792 66. Wiszniewski, W., Lewis, R.A., and Lupski, J.R. (2007). Achromatopsia: the  
793 CNGB3 p.T383fsX mutation results from a founder effect and is responsible for  
794 the visual phenotype in the original report of uniparental disomy 14. *Hum. Genet.*  
795 121, 433–439.
- 796 67. Nishiguchi, K.M., Sandberg, M.A., Gorji, N., Berson, E.L., and Dryja, T.P.  
797 (2005). Cone cGMP-gated channel mutations and clinical findings in patients with  
798 achromatopsia, macular degeneration, and other hereditary cone diseases. *Hum.*  
799 *Mutat.* 25, 248–258.
- 800 68. Kohl, S. (2000). Mutations in the CNGB3 gene encoding the beta-subunit of  
801 the cone photoreceptor cGMP-gated channel are responsible for achromatopsia  
802 (ACHM3) linked to chromosome 8q21. *Hum. Mol. Genet.* 9, 2107–2116.
- 803 69. Maguire, J., McKibbin, M., Khan, K., Kohl, S., Ali, M., and McKeefry, D.  
804 (2018). CNGB3 mutations cause severe rod dysfunction. *Ophthalmic Genet.* 39,  
805 108–114.
- 806 70. Mayer, A.K., Van Cauwenbergh, C., Rother, C., Baumann, B., Reuter, P., De

- 807 Baere, E., Wissinger, B., and Kohl, S. (2017). CNGB3 mutation spectrum  
808 including copy number variations in 552 achromatopsia patients. *Hum. Mutat.* **38**,  
809 1579–1591.
- 810 71. Nishiguchi, K.M., and Rivolta, C. (2012). Genes associated with retinitis  
811 pigmentosa and allied diseases are frequently mutated in the general population.  
812 *PLoS One* **7**,.
- 813 72. Baralle, F.E., and Giudice, J. (2017). Alternative splicing as a regulator of  
814 development and tissue identity. *Nat. Rev. Mol. Cell Biol.* **18**, 437–451.
- 815 73. Bush, S.J., Chen, L., Tovar-Corona, J.M., and Urrutia, A.O. (2017).  
816 Alternative splicing and the evolution of phenotypic novelty. *Philos. Trans. R.*  
817 *Soc. Lond. B. Biol. Sci.* **372**,.
- 818 74. ENCODE Project, Bernstein, B.E., Birney, E., Dunham, I., Green, E.D.,  
819 Gunter, C., and Snyder, M. (2012). An integrated encyclopedia of DNA elements  
820 in the human genome. *Nature*.
- 821 75. Davis, C.A., Hitz, B.C., Sloan, C.A., Chan, E.T., Davidson, J.M., Gabdank, I.,  
822 Hilton, J.A., Jain, K., Baymuradov, U.K., Narayanan, A.K., et al. (2018). The  
823 Encyclopedia of DNA elements (ENCODE): data portal update. *Nucleic Acids*  
824 *Res.* **46**, D794–D801.
- 825 76. Bönigk, W., Altenhofen, W., Müller, F., Dose, A., Illing, M., Molday, R.S., and  
826 Kaupp, U.B. (1993). Rod and cone photoreceptor cells express distinct genes for  
827 cGMP-gated channels. *Neuron* **10**, 865–877.
- 828 77. Matveev, A. V, Quiambao, A.B., Browning Fitzgerald, J., and Ding, X.-Q.

- 829 (2008). Native cone photoreceptor cyclic nucleotide-gated channel is a  
830 heterotetrameric complex comprising both CNGA3 and CNGB3: a study using  
831 the cone-dominant retina of Nrl<sup>-/-</sup> mice. *J. Neurochem.* *106*, 2042–2055.
- 832 78. Shapiro, M.B., and Senapathy, P. (1987). RNA splice junctions of different  
833 classes of eukaryotes: sequence statistics and functional implications in gene  
834 expression. *Nucleic Acids Res.* *15*, 7155–7174.
- 835 79. Yeo, G., and Burge, C.B. (2004). Maximum entropy modeling of short  
836 sequence motifs with applications to RNA splicing signals. *J. Comput. Biol.* *11*,  
837 377–394.
- 838 80. Reese, M.G., Eeckman, F.H., Kulp, D., and Haussler, D. (1997). Improved  
839 Splice Site Detection in Genie. *J. Comput. Biol.* *4*, 311–323.
- 840 81. Langmead, B., and Salzberg, S.L. (2012). Fast gapped-read alignment with  
841 Bowtie 2. *Nat. Methods* *9*, 357–359.
- 842 82. Li, H., Handsaker, B., Wysoker, A., Fennell, T., Ruan, J., Homer, N., Marth,  
843 G., Abecasis, G., Durbin, R., and 1000 Genome Project Data Processing  
844 Subgroup, 1000 Genome Project Data Processing (2009). The Sequence  
845 Alignment/Map format and SAMtools. *Bioinformatics* *25*, 2078–2079.
- 846 83. Cosset, E., Locatelli, M., Marteyn, A., Lescuyer, P., Dall'Antonia, F., Mor,  
847 F.M., Preynat-Seauve, O., Stoppini, L., and Tieng, V. (2019). Human Neural  
848 Organoids for Studying Brain Cancer and Neurodegenerative Diseases. *J. Vis.*  
849 *Exp.*
- 850 84. Gopalakrishnan, J. (2019). The Emergence of Stem Cell-Based Brain

- 851 Organoids: Trends and Challenges. *Bioessays* 41, e1900011.
- 852 85. Low, J.H., Li, P., Chew, E.G.Y., Zhou, B., Suzuki, K., Zhang, T., Lian, M.M.,  
853 Liu, M., Aizawa, E., Rodriguez Esteban, C., et al. (2019). Generation of Human  
854 PSC-Derived Kidney Organoids with Patterned Nephron Segments and a De  
855 Novo Vascular Network. *Cell Stem Cell*.
- 856 86. Prior, N., Inacio, P., and Huch, M. (2019). Liver organoids: from basic  
857 research to therapeutic applications. *Gut*.
- 858 87. Torresi, J., Tran, B.M., Christiansen, D., Earnest-Silveira, L., Schwab,  
859 R.H.M., and Vincan, E. (2019). HBV-related hepatocarcinogenesis: the role of  
860 signalling pathways and innovative ex vivo research models. *BMC Cancer* 19,  
861 707.
- 862 88. Strikoudis, A., Cieślak, A., Loffredo, L., Chen, Y.W., Patel, N., Saqi, A.,  
863 Lederer, D.J., and Snoeck, H.W. (2019). Modeling of Fibrotic Lung Disease  
864 Using 3D Organoids Derived from Human Pluripotent Stem Cells. *Cell Rep*.
- 865



## 866 Figure Legends

867 **Figure 1: Family OGI-081 variant segregation scheme and retinal**  
868 **phenotypes.** A. The OGI-081 pedigree with variant segregation scheme. B.  
869 Fundus (upper panel) and OCT image (lower panel) for the OGI-081-197 at age  
870 8, area of retinal degeneration is indicated by the red bar.

871 **Figure 2: RO differentiation.** A. Schema of the differentiation process and a  
872 light microscopy image of a typical RO. Arrow head indicating photoreceptors,  
873 scale bar = 100 microns. B-G. Immunocytochemistry on cryosections of ROs.  
874 B&E. NR2E3 staining of rod nuclei (Green). C&F. Mature cones show staining of  
875 cone opsins in the cone photoreceptor outer segments (Red). C. S opsin. F. ML  
876 opsin. D&G. Overlay of rod and cone staining. All cones are stained with ARR3  
877 (Purple). Scale bars = 20 microns.

878 **Figure 3: Comparison of IRD gene expression and splice junctions.** Human  
879 Normal Retina (HNR; N=3, gray), RO from the unaffected sibling (N=5, blue),  
880 Skin-Sun Exposed (SSE; N=473, green) and Whole Blood (WB; N=407, red).  
881 A&B Average TPM values of IRD genes. A. IRD genes are sorted by their  
882 expression in HNR overlaid with RO, SSE or WB. B. Violin plot. C&D Number of  
883 splice junctions detected by MAJIQ. C. All annotated genes. D. IRD genes.

884 **Figure 4: Alternative splicing in the *NCALD* and *CNGB3* genes.** A. Venn  
885 diagram of genes found to have alternative splicing events in OGI-081  
886 comparison of affected vs. unaffected siblings and genes found to have  
887 segregating allelic pairs (green). Alternative splicing analysis was conducted by

888 MAJIQ (blue) and CASH (red). B. Collapsed diagram of exons (black boxes) from  
889 all isoforms of the *NCALD* and *CNGB3* genes. DNA variants (red); MAJIQ (blue)  
890 and CASH (yellow) alternative splicing events (E). Events detected by MAJIQ are  
891 depicted as split reads arches. The event range detected by CASH is depicted by  
892 the left (L) and right (R) borders. Genomic locations of variants, junctions and  
893 event borders are given in table S6.

894 **Figure 5: Aberrant splicing of *CNGB3* in the affected vs. unaffected**

895 **siblings.** A. Sashimi plot presenting RNA-seq results showing a cryptic exon  
896 spliced into the isoform as a result of the intronic variant chr8:g.87618576G>A.  
897 The cryptic exon is only present in the affected sibling (lower panel, red) and not  
898 in the unaffected sibling (upper panel, blue). The splice junction between exon  
899 14b and exon 15 is not represented by split reads in the Sashimi plot due to an  
900 alignment error (FigureS1). B. RT-PCR using primers from the canonical exon14  
901 and exon 15. All three siblings express the normal size isoform lacking exon 14b  
902 (lower band). A larger abnormal band containing exon14b (upper band) is  
903 present in the two affected siblings Af1 and Af2 but not in the unaffected sibling  
904 (Un). Negative controls lacking RNA template in the RT reaction (NC1) and NC1  
905 used as template for PCR amplification (NC2). Sanger sequencing of the larger  
906 band confirming the inclusion of exon 14b. C. Schematic representation of the  
907 protein domains in W.T *CNGB3* and the two mutant alleles found in the affected  
908 siblings of OGI-081.

909 **Figure 6: Mislocalization of the *CNGB3* truncated proteins.**

910 Immunocytochemical analysis of day 262 ROs from the heterozygous parent

911 OGI-081-200 (A-C) and an affected sibling OGI-081-197 (D-F). In the  
912 heterozygote, both ML opsins (red) and CNGB3 (green) are localized to the  
913 photoreceptor outer segments whereas in the affected sibling, CNGB3 localizes  
914 to the photoreceptor inner segments. An exemplary photoreceptor outer segment  
915 is indicated by the white brackets. Nuclei are counterstained with DAPI (blue).  
916 Scale bars = 20 micron

917

918 **Table 1: Sample level alignment report and QC summary.** A high average  
 919 unique percentage alignment rate is reported.

| SampleName    | RawReads <sup>a</sup> | HQReads <sup>b</sup> | % UniqAligned <sup>c</sup> |
|---------------|-----------------------|----------------------|----------------------------|
| OGI-081-197-1 | 159,976,749           | 129,671,633          | 87.73                      |
| OGI-081-197-2 | 256,399,765           | 234,701,223          | 90.52                      |
| OGI-081-197-3 | 166,237,226           | 155,442,261          | 88.88                      |
| OGI-081-198-1 | 167,327,080           | 145,058,230          | 88.66                      |
| OGI-081-198-2 | 197,037,935           | 179,026,100          | 89.13                      |
| OGI-081-198-3 | 191,485,904           | 177,663,416          | 90.15                      |
| OGI-081-340-1 | 175,199,604           | 156,566,678          | 91.01                      |
| OGI-081-340-2 | 227,928,431           | 216,526,830          | 89.53                      |
| OGI-081-340-3 | 137,096,260           | 129,192,437          | 90.47                      |
| OGI-081-340-4 | 151,572,341           | 140,982,711          | 90.59                      |
| OGI-081-340-5 | 164,908,758           | 154,550,198          | 99.66                      |

920 <sup>a</sup> Raw reads count (RawReads), <sup>b</sup> Filtered high quality reads (HQReads), <sup>c</sup>

921 Percent of uniquely aligned reads (% UniqAligned).

922 **Table 2: Splicing junctions involved with the inclusion of exon14b.**

|                          | Exon 14 Donor site | Exon 14b Acceptor site | Exon 14b Donor site |                | Exon 15 Acceptor site |           |
|--------------------------|--------------------|------------------------|---------------------|----------------|-----------------------|-----------|
|                          | Annotated          | W.T                    | W.T                 | Variant        | Annotated             | W.T       |
| NM_019098.4 <sup>a</sup> | c.1662             | c.1663-2238            | c.1663-2137         | c.1663-2137C>T | c.1663                | c.1663-54 |
| SSF <sup>b</sup>         | 95.3               | 83.3                   | 67.8                | 73.7           | 76.7                  | 90.4      |
| MaxEntScan <sup>c</sup>  | 10.5               | 4.8                    | 0                   | 4.8            | 6.1                   | 8.7       |
| NNSplice <sup>d</sup>    | 1                  | 0.5                    | 0                   | 1              | 0.1                   | 0.8       |

923 <sup>a</sup> The NM\_019098.4 isoform of CNGB3 is used to define the cDNA coordinates. <sup>b-</sup>

924 <sup>d</sup> Splicing prediction scores are given from the three algorithms, SSF,

925 MaxEntScan and NNSplice.

A.

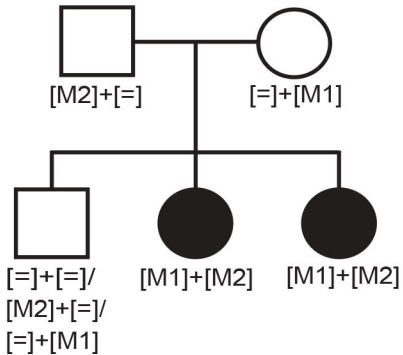

B.

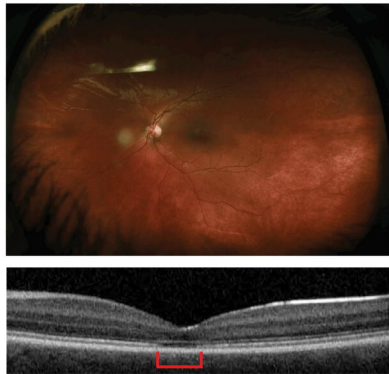

A.

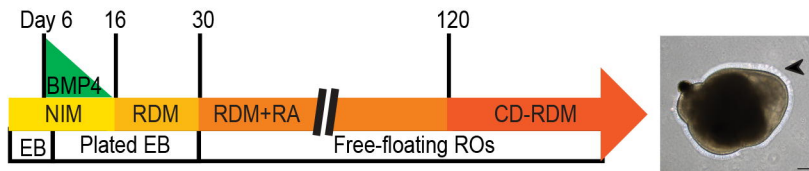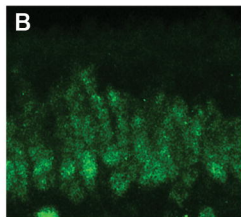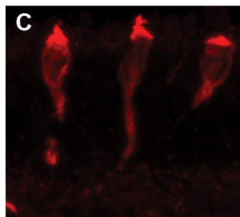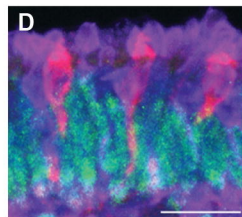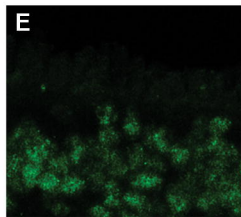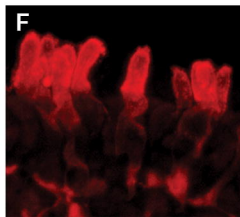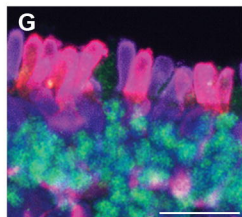

**A.****RO****SSE****WB**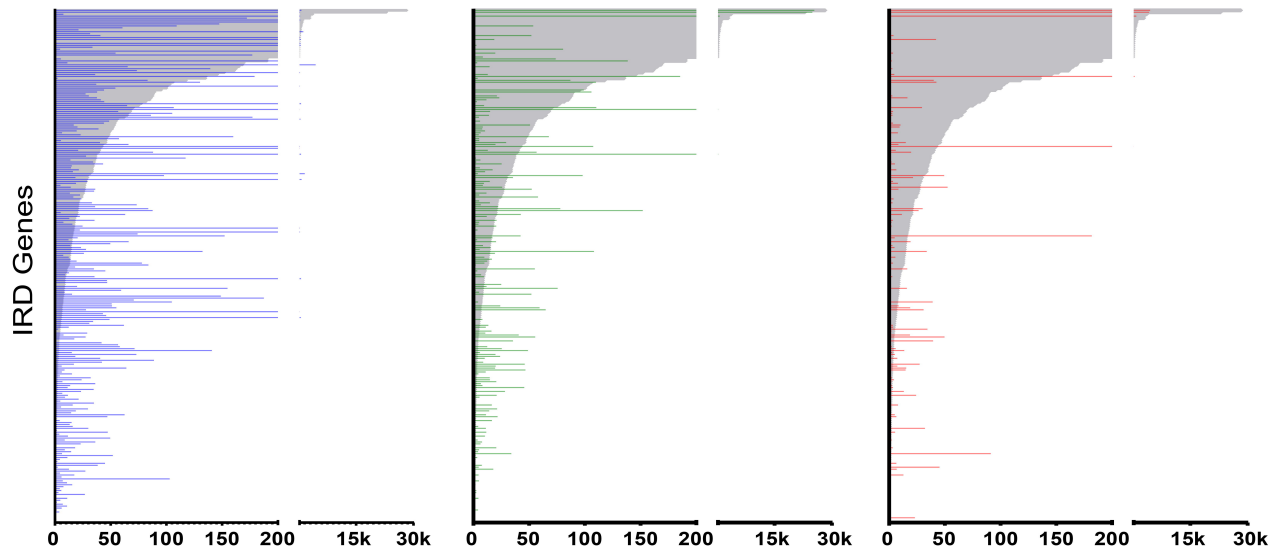**B.****IRD Genes**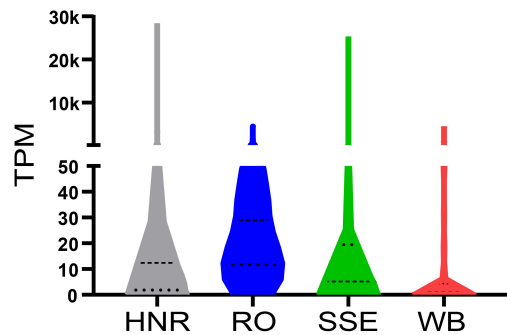**C.****All Genes**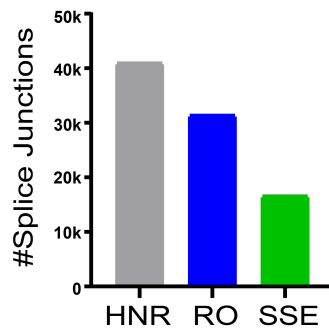**D.****IRD Genes**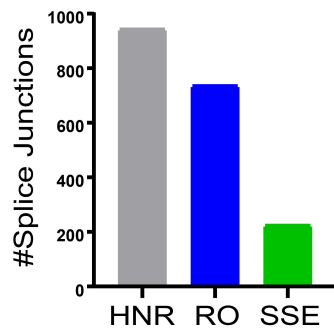

A.

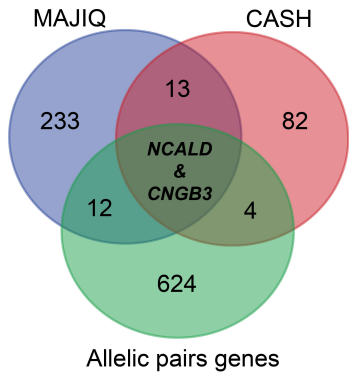

B.

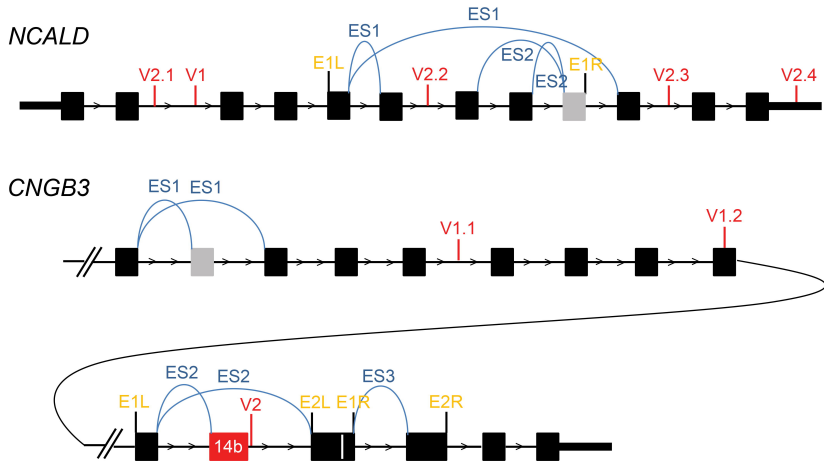



A.

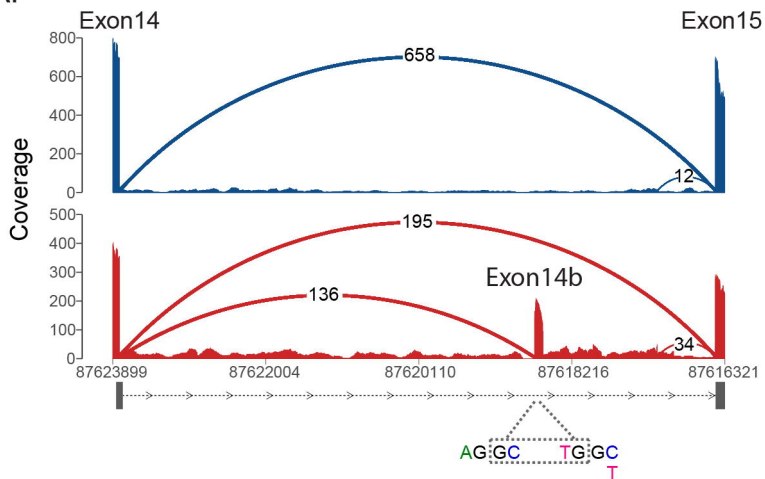

B.

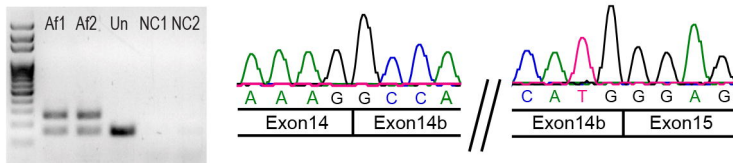

C.

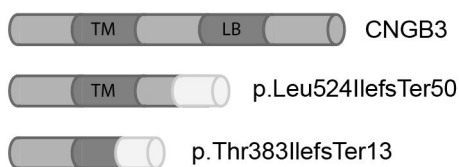

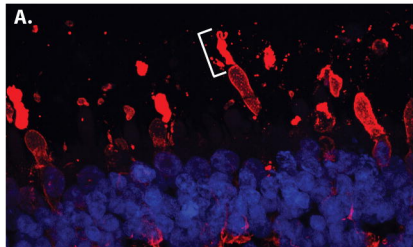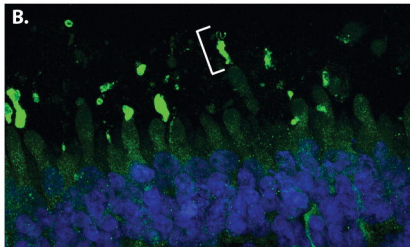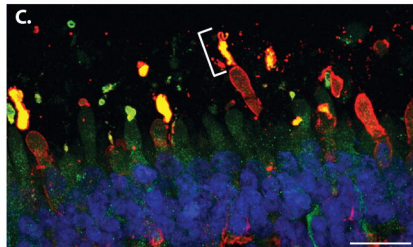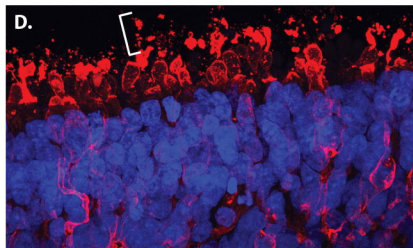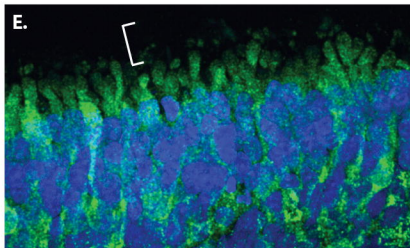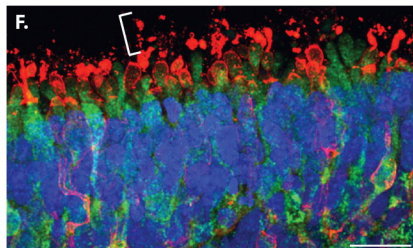

Source: https://www.biorxiv.org/content/10.1101/766717v1.full.pdf
